# Supplementary material
Source: HighWire-hosted journal article supplement (https://bmjopenquality.bmj.com/highwire/filestream/143795/field_highwire_adjunct_files/0/bmjoq-2022-001844supp001_data_supplement.pdf)
Supplement: bmjoq-2022-001844supp001_data_supplement.pdf [file bmjoq-2022-001844supp001_data_supplement.pdf]

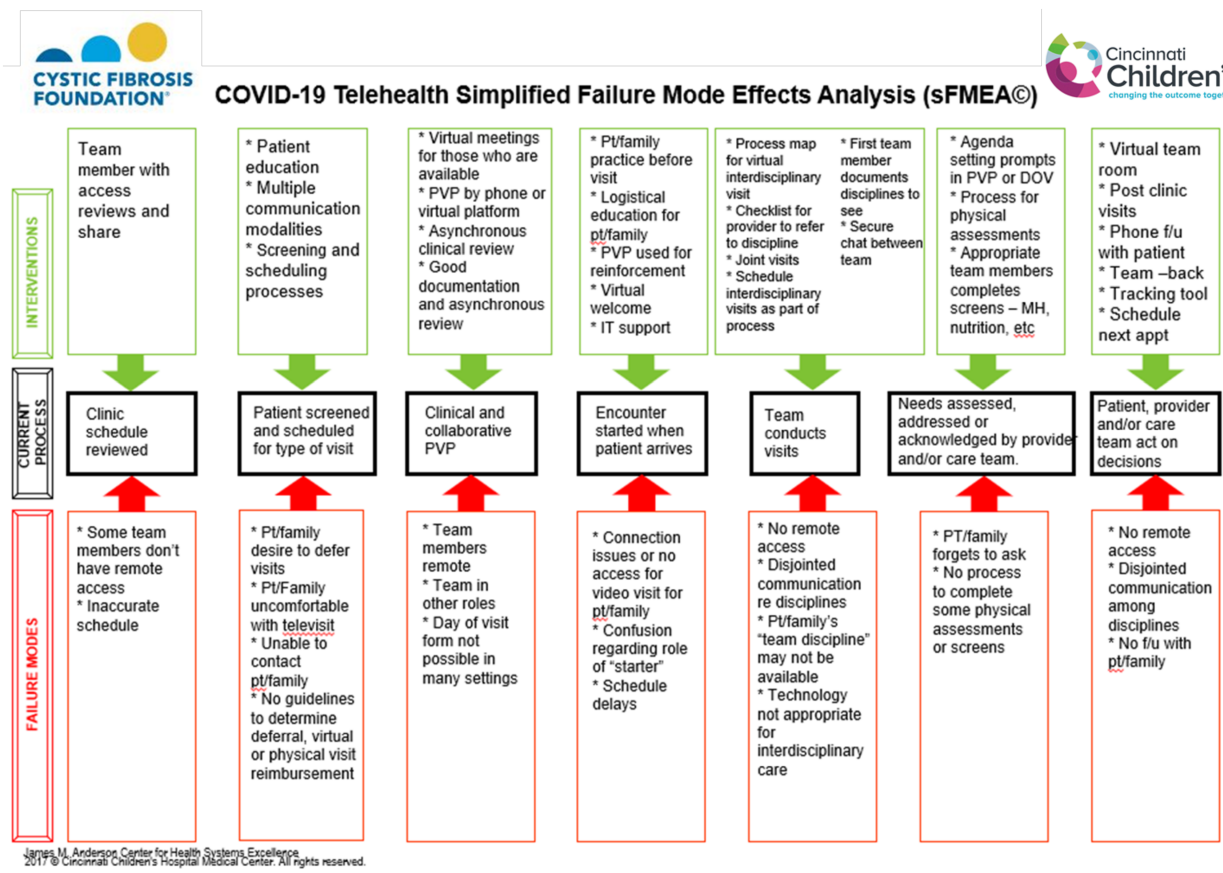

Appendix Figure 1. sFMEA Telehealth Simplified Failure Mode Effects Analysis; Adapted from Cincinnati Children’s Hospital Medical Center A simplified FMEA is a process improvement tool to identify potential risks of failure in a process and identify process improvement strategies. Each process step is listed in a single textbox along the center of the diagram. In the textboxes below the process step, outlined in red, risks to successful completion of each step are named. The textboxes above the process steps, outlined in green, name the interventions identified to mitigate risk of process failure.
